# Supplementary material for: Highly Sensitive ZnO/Au Nanosquare Arrays Electrode for Glucose Biosensing by Electrochemical and Optical Detection
Source: MDPI journal article supplement (doi:10.3390/molecules28020617), 2023-01-07
Supplement: s1 [file s1]

## Supplementary Materials (SM)

# Highly Sensitive ZnO/Au Nanosquare Array Electrode for Glucose Biosensing by Electrochemical and Optical Detection

Vinda Zakiyatuz Zulfa <sup>1</sup>, Nasori Nasori <sup>1,\*</sup>, Ulya Farahdina <sup>1</sup>, Miftakhul Firdhaus <sup>1</sup>, Ihwanul Aziz <sup>2</sup>, Hari Suprihatin <sup>2</sup>, Muslikha Nourma Rhomadhoni <sup>3</sup> and Agus Rubiyanto <sup>1</sup>

<sup>1</sup> Laboratory Medical Physics and Biophysics, Department of Physics, Faculty of Sciences and Data Analytic, Sepuluh Nopember Technology Institute, Surabaya 60111, Indonesia

<sup>2</sup> Research Center for Accelerator Technology, Research Organization of Nuclear Energy, National Research and Innovation Agency (BRIN) Yogyakarta 55281, Indonesia

<sup>3</sup> Occupational and Safety Department, Nahdlatul Ulama University of Surabaya, Surabaya 60237, Indonesia

\* Correspondence: nat.nasori@physics.its.ac.id

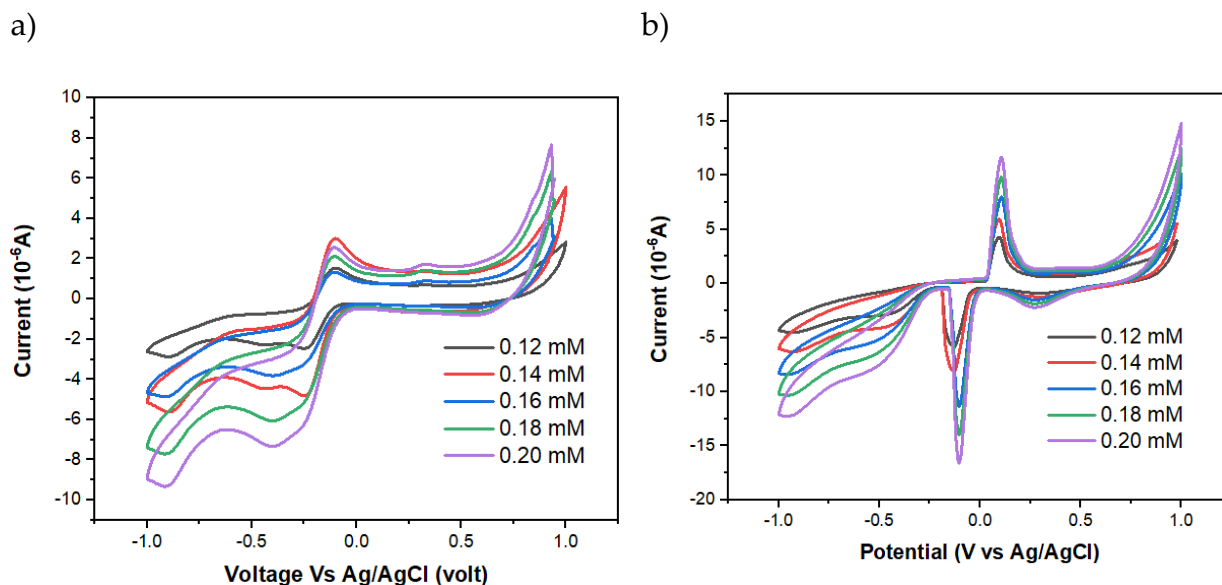

**Figure S1.** CV graph of the ZnO/Au nanosquare array with the addition of GOx with varying concentrations of a) fructose and and b) sucrose.
